# Supplementary material for: Theory and associated phenomenology for intrinsic mortality arising from natural selection
Source: PubMed Central journal article supplement (PMC5371302; doi:10.1371/journal.pone.0173677), 2017-03-29
Supplement: pone.0173677.s002.pdf [file pone.0173677.s002.pdf]

**Table S1. Consumers with the capacity for intrinsic mortality dominate those without it in invasion experiments.**

|                      |          | Invaded                          |                                |
|----------------------|----------|----------------------------------|--------------------------------|
|                      |          | Immortal                         | Mortal                         |
| $g = 0.05, v = 0.05$ |          |                                  |                                |
| Invader              | Mortal   | $(2.51 \pm 0.05) \times 10^{-2}$ | $(1.0 \pm 0.7) \times 10^{-5}$ |
|                      | Immortal | $(2 \pm 1) \times 10^{-5}$       | 0                              |

|                     |          | Invaded                          |                                |
|---------------------|----------|----------------------------------|--------------------------------|
|                     |          | Immortal                         | Mortal                         |
| $g = 0.05, v = 0.1$ |          |                                  |                                |
| Invader             | Mortal   | $(1.91 \pm 0.04) \times 10^{-2}$ | $(1.1 \pm 0.3) \times 10^{-4}$ |
|                     | Immortal | $(1.2 \pm 0.3) \times 10^{-4}$   | 0                              |

|                     |          | Invaded                          |                                |
|---------------------|----------|----------------------------------|--------------------------------|
|                     |          | Immortal                         | Mortal                         |
| $g = 0.05, v = 0.2$ |          |                                  |                                |
| Invader             | Mortal   | $(1.23 \pm 0.04) \times 10^{-2}$ | $(1.6 \pm 0.4) \times 10^{-4}$ |
|                     | Immortal | $(2.8 \pm 0.5) \times 10^{-4}$   | 0                              |

|                     |          | Invaded                          |                            |
|---------------------|----------|----------------------------------|----------------------------|
|                     |          | Immortal                         | Mortal                     |
| $g = 0.1, v = 0.05$ |          |                                  |                            |
| Invader             | Mortal   | $(2.51 \pm 0.05) \times 10^{-2}$ | $(2 \pm 1) \times 10^{-5}$ |
|                     | Immortal | $(2 \pm 1) \times 10^{-5}$       | 0                          |

|                    |          | Invaded                          |                            |
|--------------------|----------|----------------------------------|----------------------------|
|                    |          | Immortal                         | Mortal                     |
| $g = 0.1, v = 0.1$ |          |                                  |                            |
| Invader            | Mortal   | $(2.38 \pm 0.05) \times 10^{-2}$ | $(5 \pm 2) \times 10^{-5}$ |
|                    | Immortal | $(1.4 \pm 0.4) \times 10^{-4}$   | 0                          |

|                    |          | Invaded                          |                                |
|--------------------|----------|----------------------------------|--------------------------------|
|                    |          | Immortal                         | Mortal                         |
| $g = 0.1, v = 0.2$ |          |                                  |                                |
| Invader            | Mortal   | $(1.80 \pm 0.04) \times 10^{-2}$ | $(1.1 \pm 0.3) \times 10^{-4}$ |
|                    | Immortal | $(1.1 \pm 0.3) \times 10^{-4}$   | 0                              |

|                     |          | Invaded                          |                            |
|---------------------|----------|----------------------------------|----------------------------|
|                     |          | Immortal                         | Mortal                     |
| $g = 0.2, v = 0.05$ |          |                                  |                            |
| Invader             | Mortal   | $(2.24 \pm 0.05) \times 10^{-2}$ | $(2 \pm 1) \times 10^{-5}$ |
|                     | Immortal | $(3 \pm 2) \times 10^{-5}$       | 0                          |

|                    |          | Invaded                          |                            |
|--------------------|----------|----------------------------------|----------------------------|
|                    |          | Immortal                         | Mortal                     |
| $g = 0.2, v = 0.1$ |          |                                  |                            |
| Invader            | Mortal   | $(2.44 \pm 0.05) \times 10^{-2}$ | $(5 \pm 2) \times 10^{-5}$ |
|                    | Immortal | $(1.1 \pm 0.3) \times 10^{-4}$   | 0                          |

|                    |          | Invaded                         |                            |
|--------------------|----------|---------------------------------|----------------------------|
|                    |          | Immortal                        | Mortal                     |
| $g = 0.2, v = 0.2$ |          |                                 |                            |
| Invader            | Mortal   | $(2.12 \pm 0.5) \times 10^{-2}$ | $(1 \pm 1) \times 10^{-5}$ |
|                    | Immortal | $(7 \pm 3) \times 10^{-5}$      | 0                          |

Probabilities of successful invasions for different values of resource growth rate  $g$  and consumption rate  $v$  (all with reproduction cost  $c=0$ ), and for each combination of invaders and invaded having or lacking the capacity for intrinsic mortality (“mortal” and “immortal”, respectively).
